# Supplementary material for: BRD2 inhibition blocks SARS-CoV-2 infection in vitro by reducing transcription of the host cell receptor ACE2
Source: PubMed Central journal article supplement (PMC7836110; doi:10.1101/2021.01.19.427194), 2021-01-19
Supplement: NIHPP2021.01.19.427194-supplement-1.pdf [file NIHPP2021.01.19.427194-supplement-1.pdf]

Probes: ACE2, GAPDH

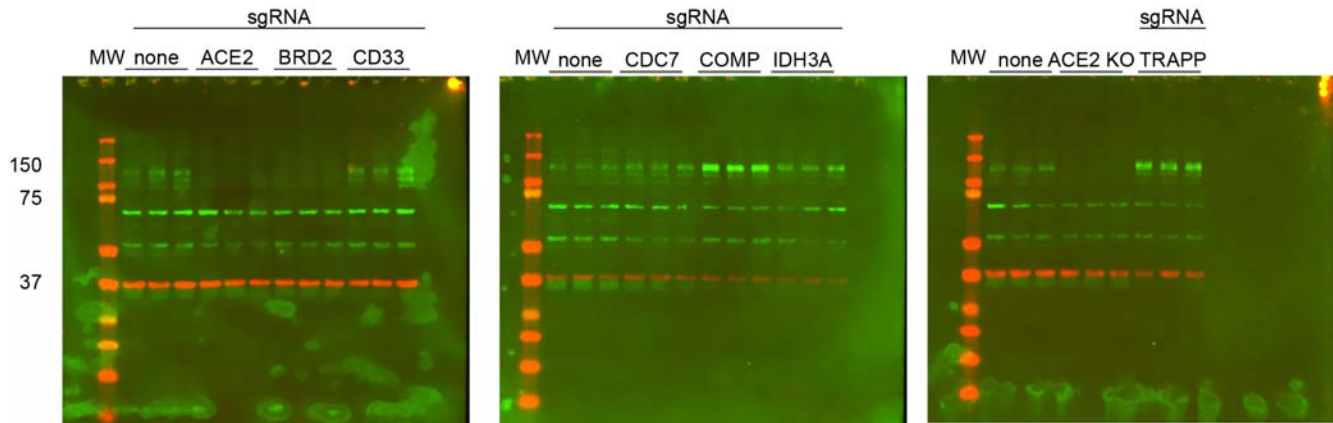

**Supplemental Figure 1: Full-size Western blots, associated with Fig. 2a and Extended Data Fig. 2**

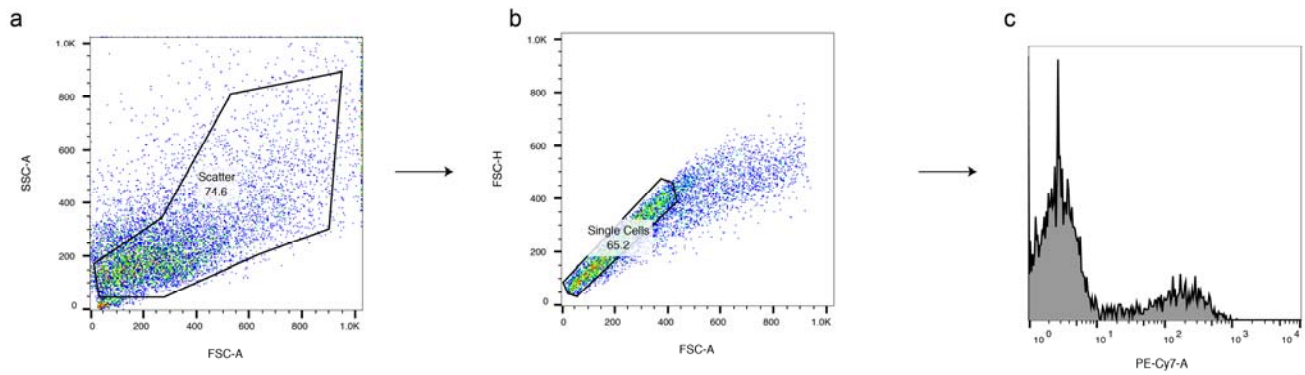

**Supplemental Figure 2: Flow cytometry gating strategy, associated with Fig. 1**
